# Supplementary material for: 4-Methylpseudoproline derived from α-methylserine – synthesis and conformational studies
Source: Royal Society of Chemistry journal article supplement (doi:10.1039/c2ob25732g), 2012-01-01
Supplement: c2ob25732g.pdf [file c2ob25732g.pdf]

## Supplementary information

### 4-Methylpseudoproline derived from $\alpha$ -methylserine – synthesis and conformational studies

Joanna Katarzynska, Adam Mazur, Wojciech M. Wolf, Simon J. Teat, Stefan Jankowski,

Mirosław T. Leplawy and Janusz Zabrocki

#### Contents:

**Figure S2.**  $^1\text{H}$  NMR spectra of dipeptides **3a** and **3b** recorded in  $\text{CDCl}_3$  at 700 MHz.

**Figure S1.**  $^1\text{H}$  NMR spectra of tripeptides **6a** and **6b** recorded in  $\text{CDCl}_3$  at 700 MHz.

**Figure S3.** COSY spectrum of peptide **6a** in  $\text{CDCl}_3$  (700 MHz).

**Figure S4.**  $^1\text{H}$  NMR spectrum of tripeptide **1b** recorded in  $\text{CDCl}_3$  at 700 MHz.

**Figure S5.** COSY spectrum of peptide **6b** in  $\text{CDCl}_3$  (700 MHz).

**Figure S6.** Temperature effect on NH chemical shifts for peptide **6a**. Spectra were recorded every 5K starting from 300 K (bottom) to 320 K (top).

**Figure S7.** Temperature effect on NH chemical shifts for peptide **6b**. Spectra were recorded every 5K starting from 300 K (bottom) to 320 K (top).

**Figure S8.** FTIR absorption spectra in the NH stretching region ( $3600 - 3300 \text{ cm}^{-1}$ ) and in the CO stretching region ( $1850 - 1600 \text{ cm}^{-1}$ ) for 2 mM samples of **6a** (top) and **6b** (bottom) in  $\text{CDCl}_3$ .

**Figure S9.** Superposition of the two symmetrically independent molecules **a** and **b** of the Fmoc-Ala-(*R*)- $\alpha$ MeSer( $\Psi$ Pro)-Ala-OBu<sup>t</sup> (**6a**).

**Figure S10.** Packing diagram with hydrogen bonds indicated with dashed lines.

**Table S1.** Main chain torsion angles ( $^{\circ}$ ) defining the peptide conformation of the two symmetrically independent molecules **a** (first entry) and **b** (second entry) of Fmoc-Ala-(*R*)-( $\alpha$ Me)Ser( $\Psi$ Pro)-Ala-OBu<sup>t</sup> (**6a**).

**Table S2** Intra- and Intermolecular Hydrogen Bond Parameters for the Fmoc-Ala-(*R*)-( $\alpha$ MeSer)( $\Psi$ Pro)-Ala-OBu<sup>t</sup> (**6a**). Distances and angles are in ( $\text{\AA}$ ) and ( $^{\circ}$ ), respectively.

**Table S3** Endocyclic 1,3-oxazolidine torsion angles ( $^{\circ}$ ) for each symmetrically independent molecule **a** (upper section) and **b** (lower section) of Fmoc-Ala-(*R*)- $\alpha$ MeSer( $\Psi$ Pro)-Ala-OBu<sup>t</sup> (**6a**) accompanied by the three lowest asymmetry parameters ( $^{\circ}$ ).

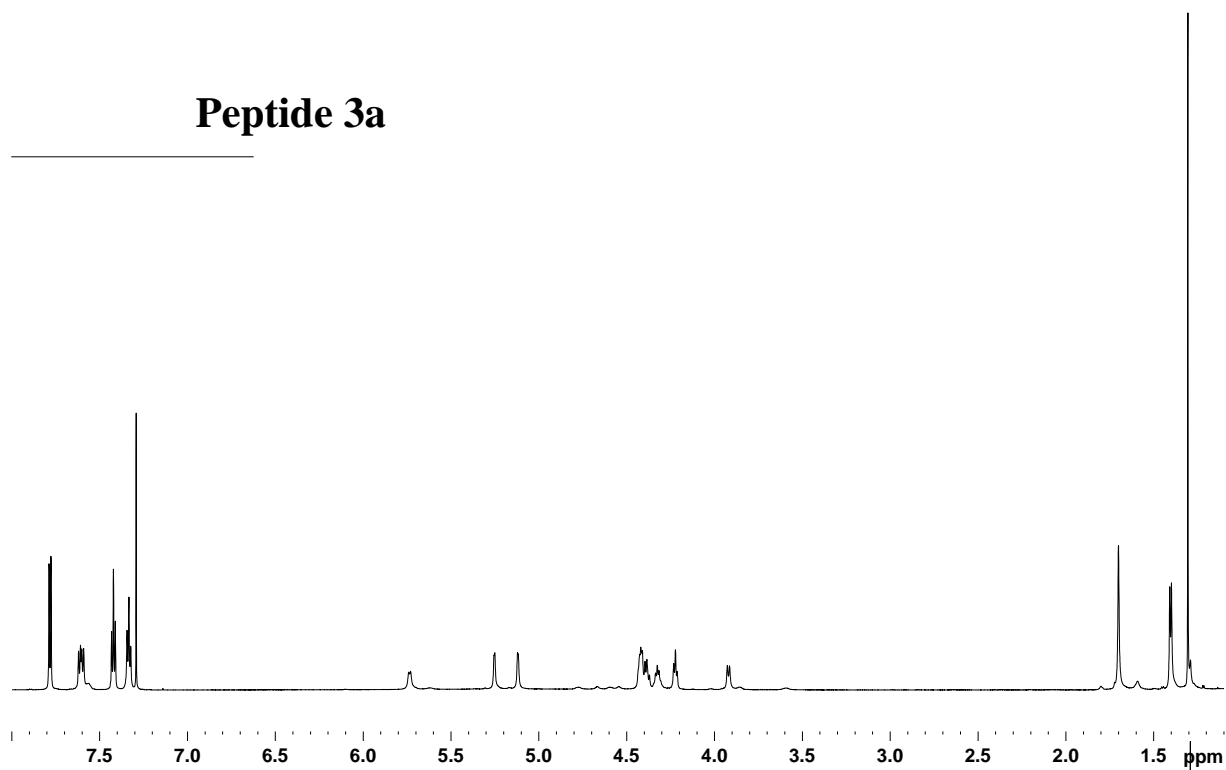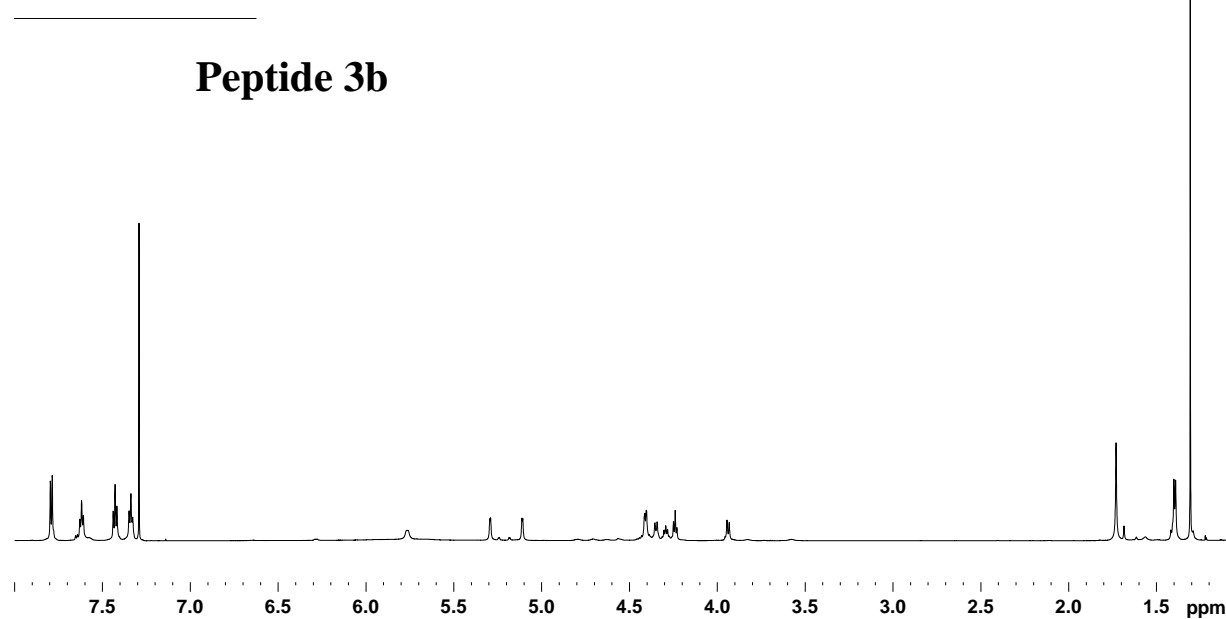

**Figure S1.** <sup>1</sup>H NMR spectra of dipeptides **3a** and **3b** recorded in CDCl<sub>3</sub> at 700 MHz.

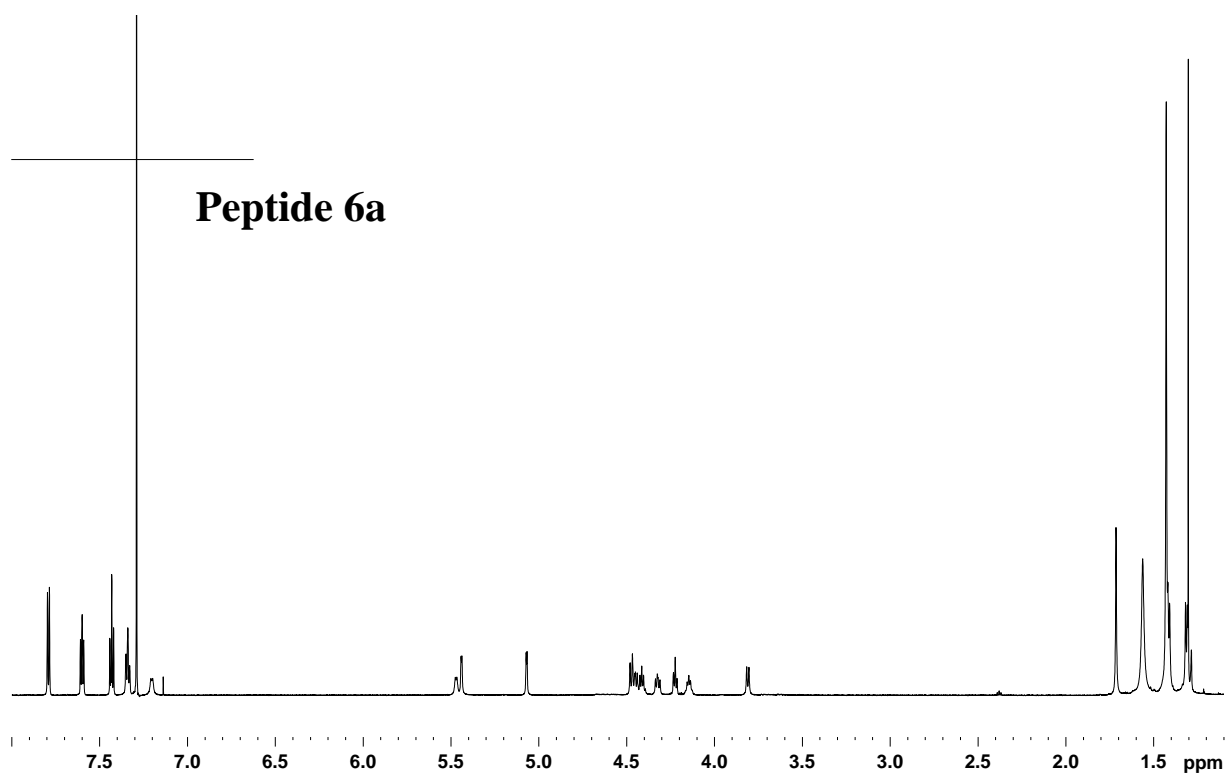

**Figure S2.**  $^1\text{H}$  NMR spectrum of tripeptide **6a** recorded in  $\text{CDCl}_3$  at 700 MHz.

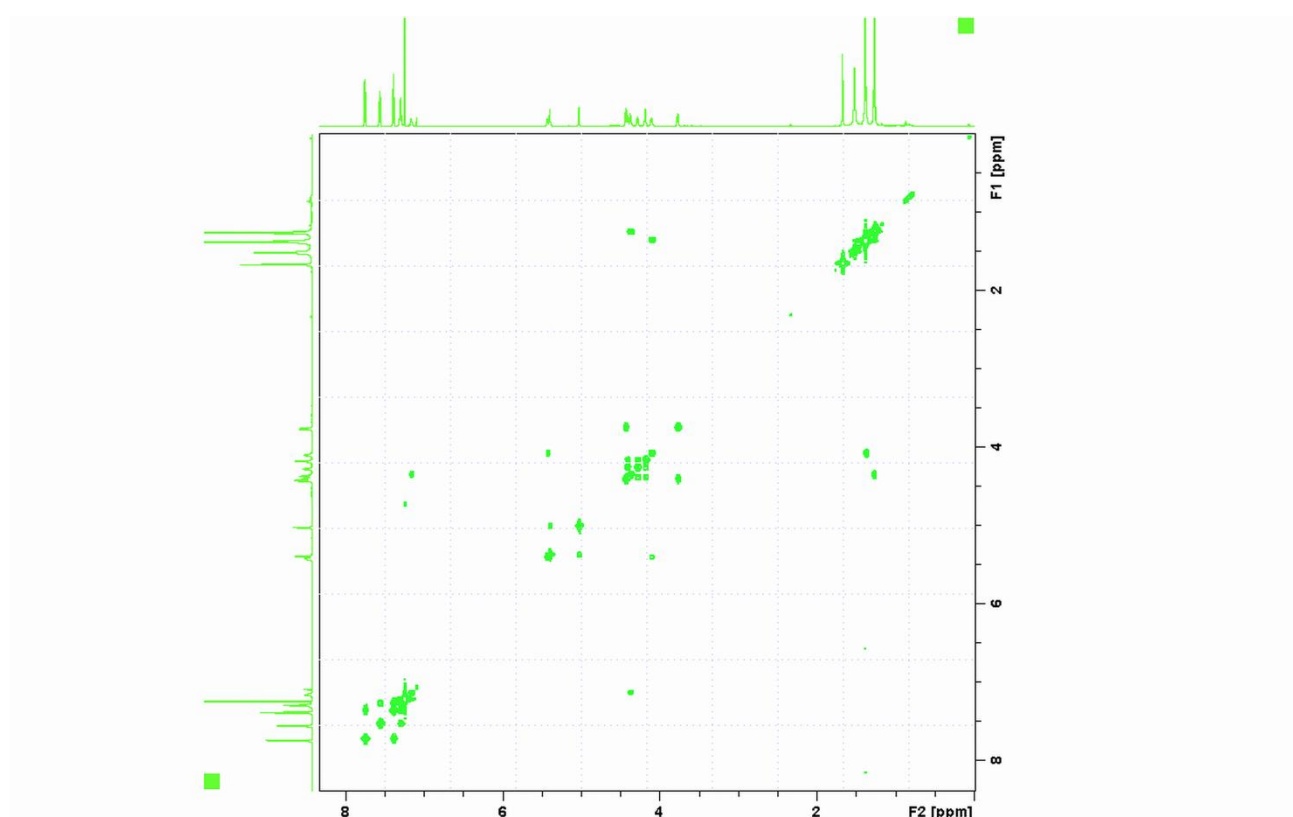

**Figure S3.** COSY spectrum of peptide **6a** in  $\text{CDCl}_3$  (700 MHz).

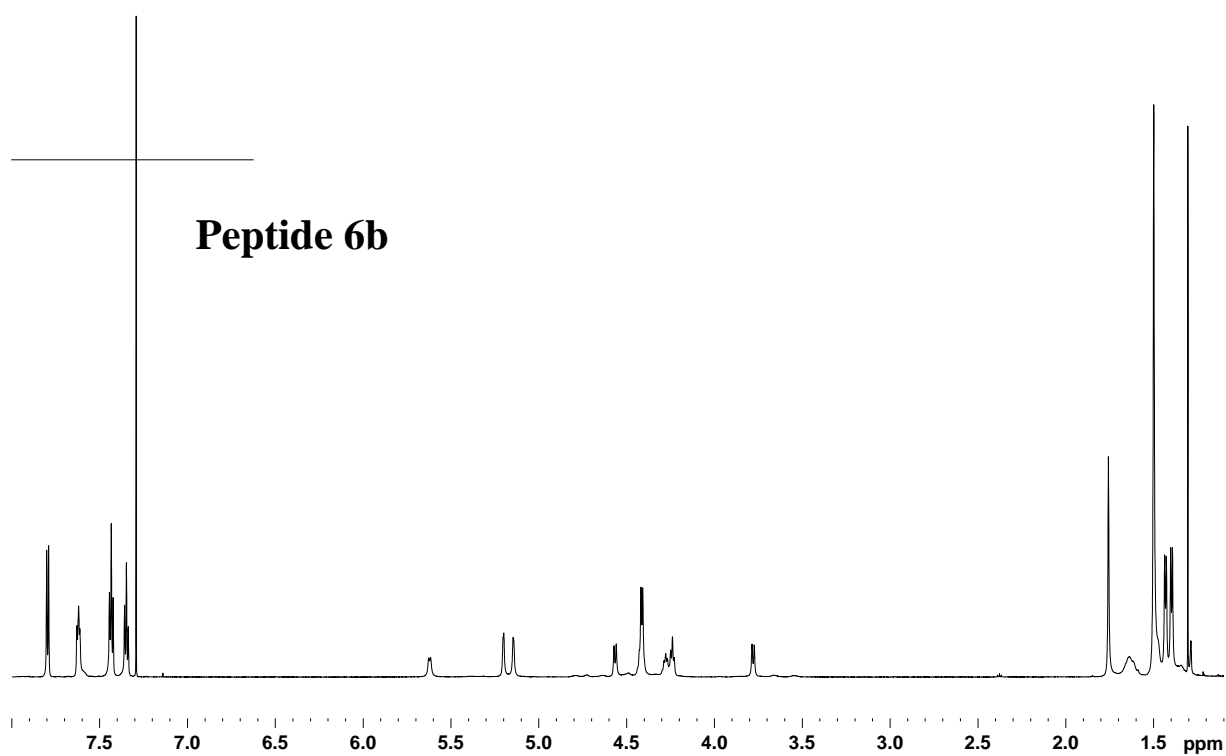

**Figure S4.**  $^1\text{H}$  NMR spectrum of tripeptide **6b** recorded in  $\text{CDCl}_3$  at 700 MHz.

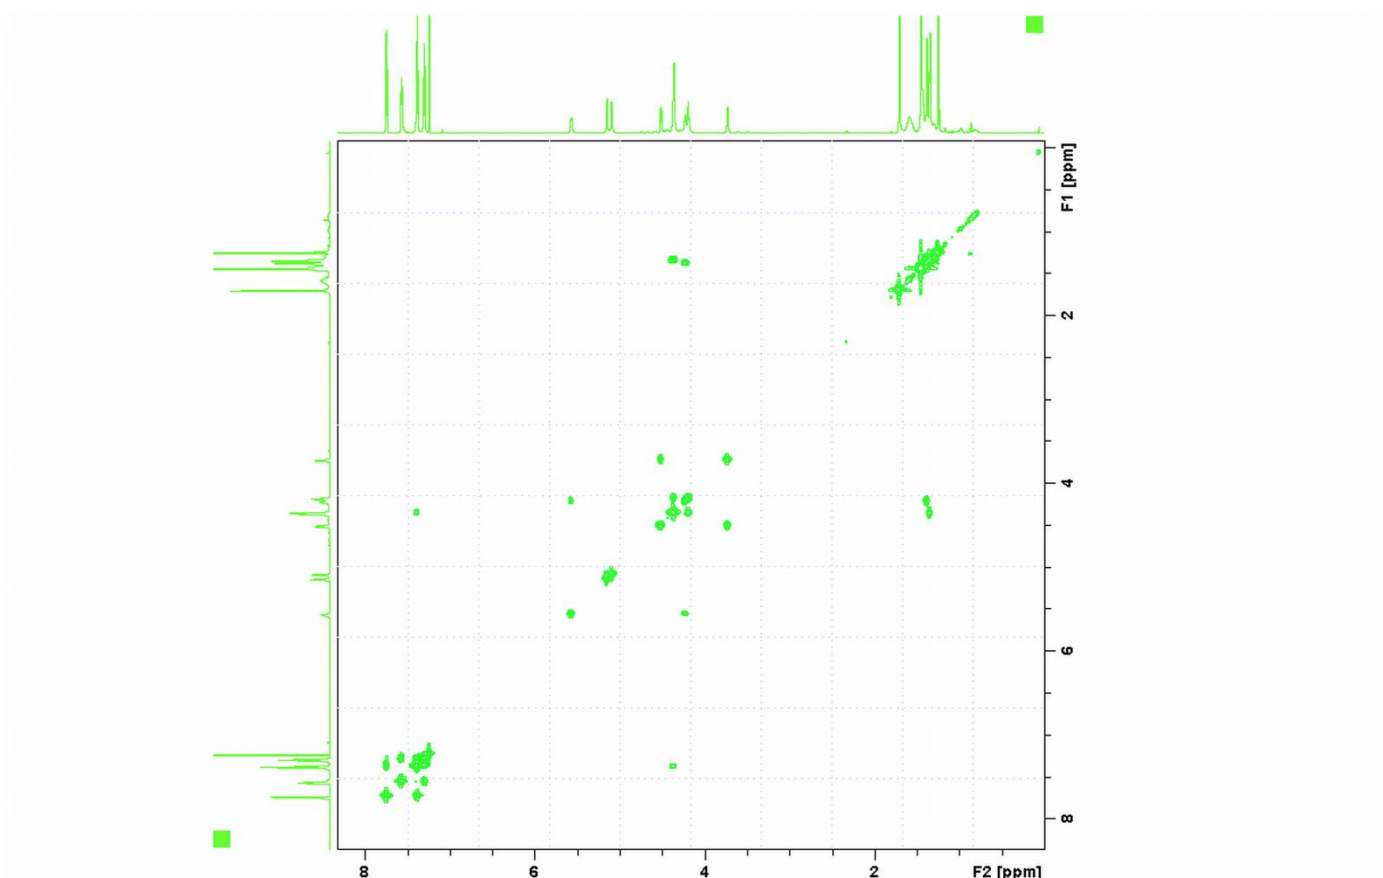

**Figure S5.** COSY spectrum of peptide **6b** in  $\text{CDCl}_3$  (700 MHz).

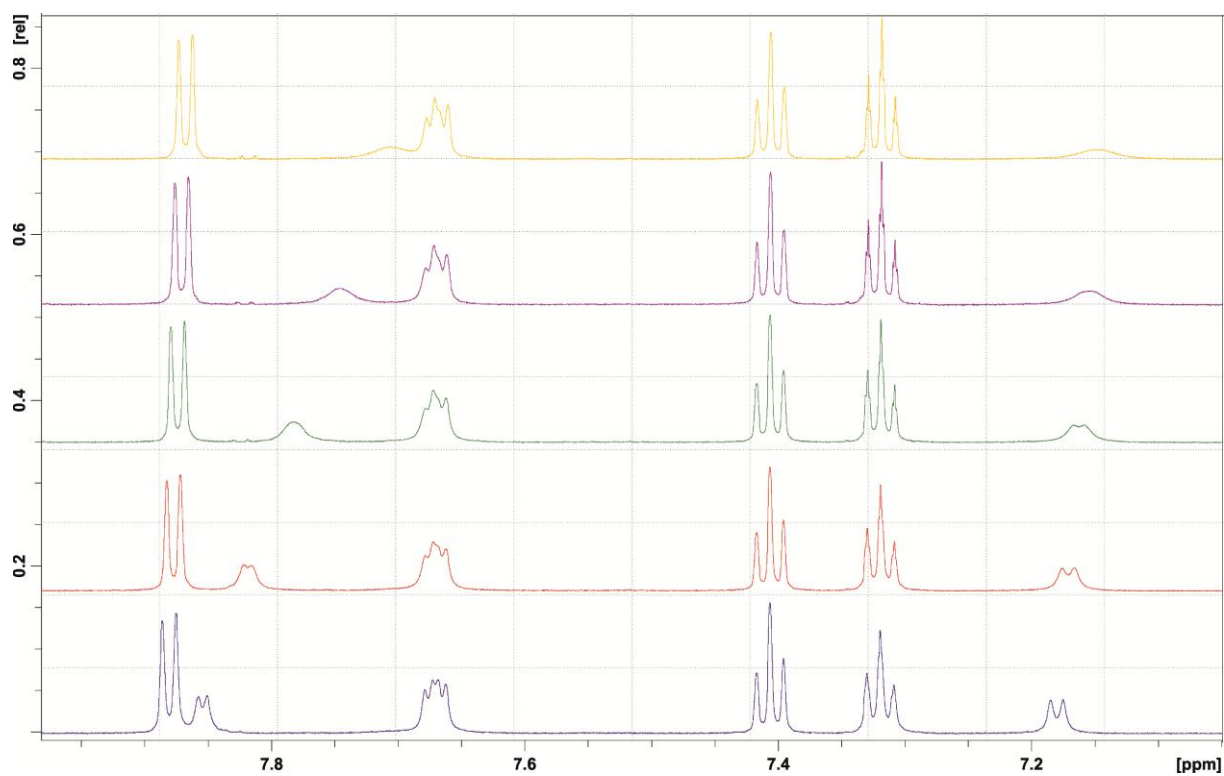

**Figure S6.** Temperature effect on NH chemical shifts for peptide **6a**. Spectra were recorded at 5 K intervals from 300 K (bottom) to 320 K (top).

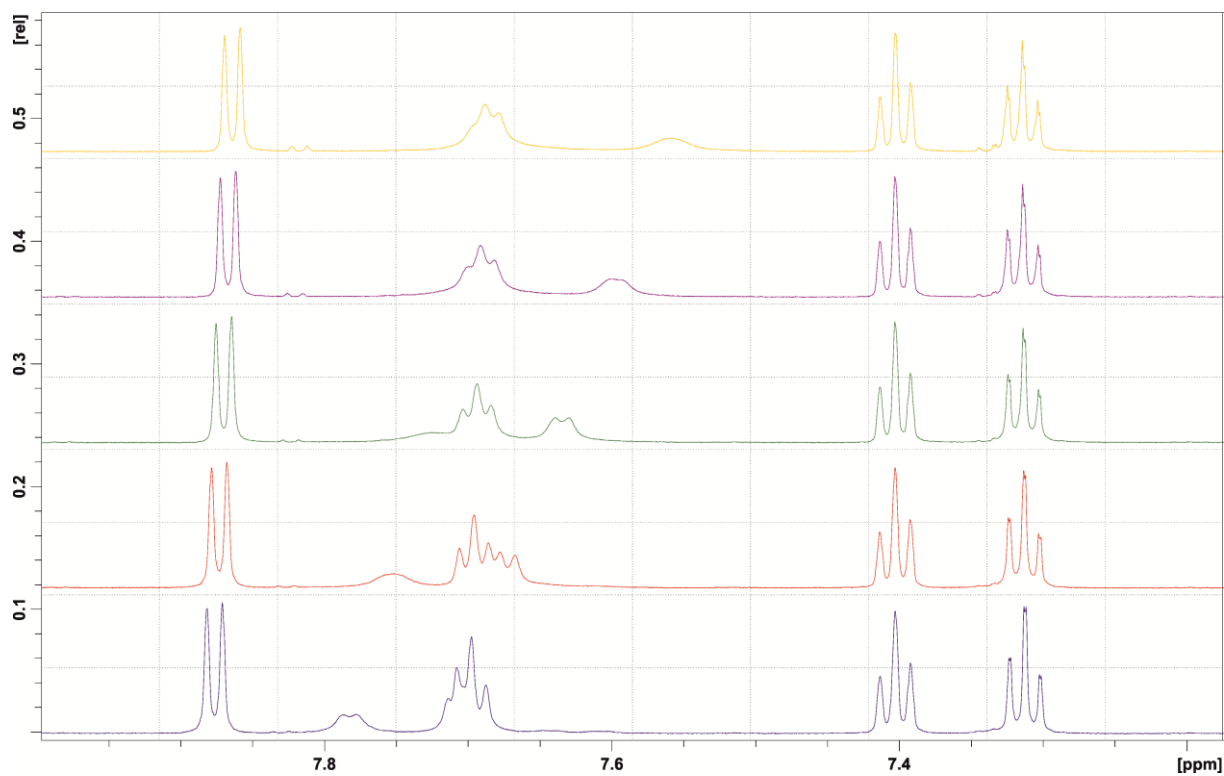

**Figure S7.** Temperature effect on NH chemical shifts for peptide **6b**. Spectra were recorded at 5K intervals from 300 K (bottom) to 320 K (bottom).

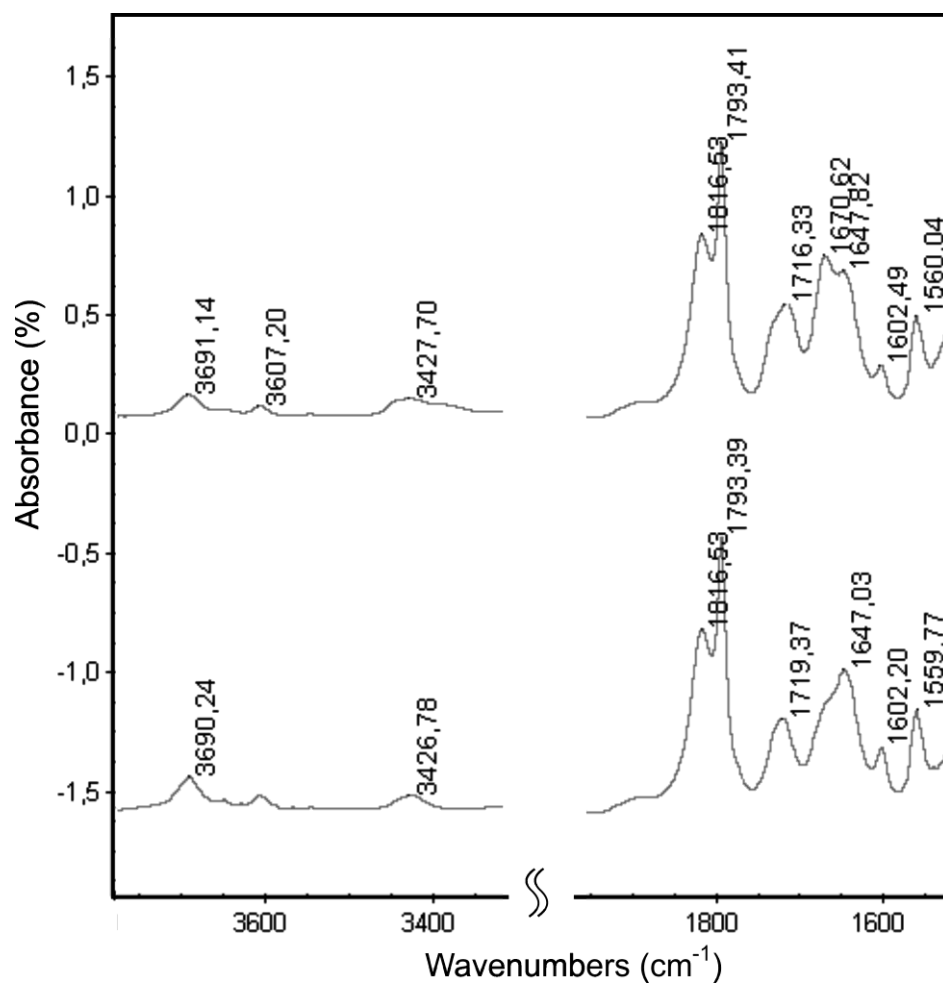

**Figure S8.** FTIR absorption spectra in the NH stretching region (3600 – 3300 cm<sup>-1</sup>) and in the CO stretching region (1850 – 1600 cm<sup>-1</sup>) for 2 mM samples of **6a** (top) and **6b** (bottom) in CDCl<sub>3</sub>.



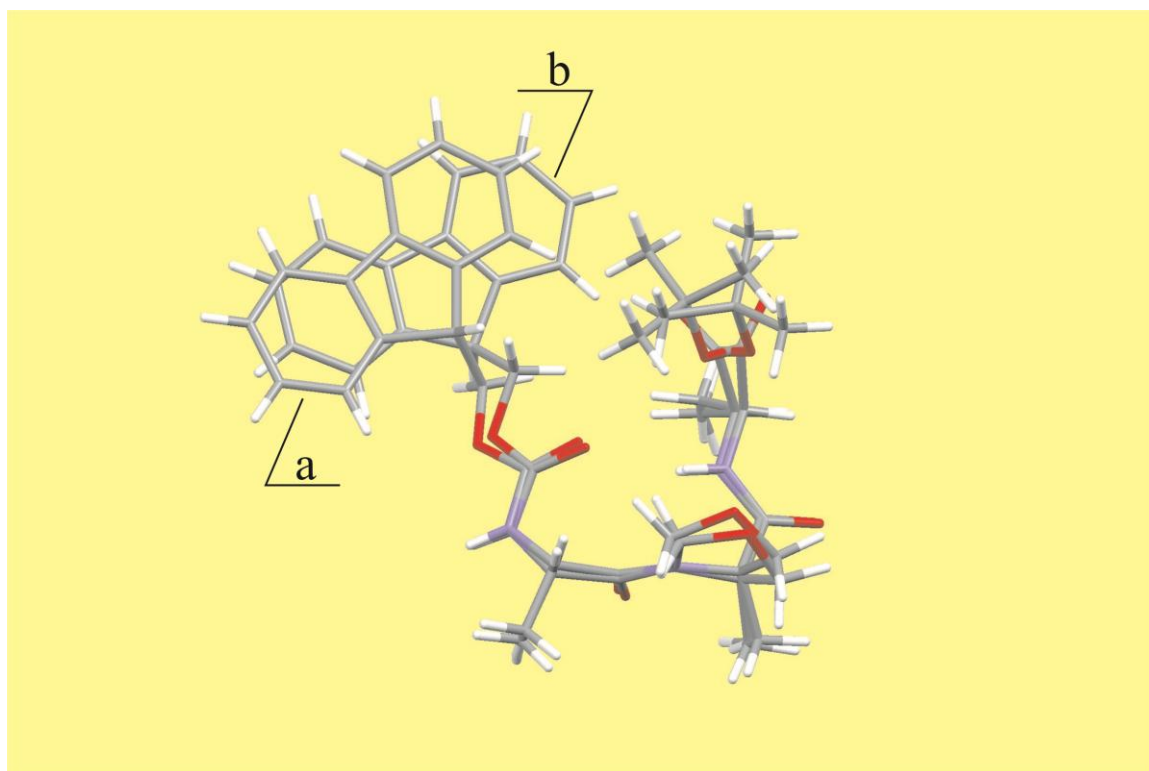

**Figure S9.** Superposition of the two symmetrically independent molecules **a** and **b** of the Fmoc-Ala-(*R*)- $\alpha$ MeSer( $\Psi$ Pro)-Ala-OBu<sup>t</sup> (**6a**). Only distances between the respective main chain atoms were minimized. The root mean square displacement of the fit was 0.19 Å.

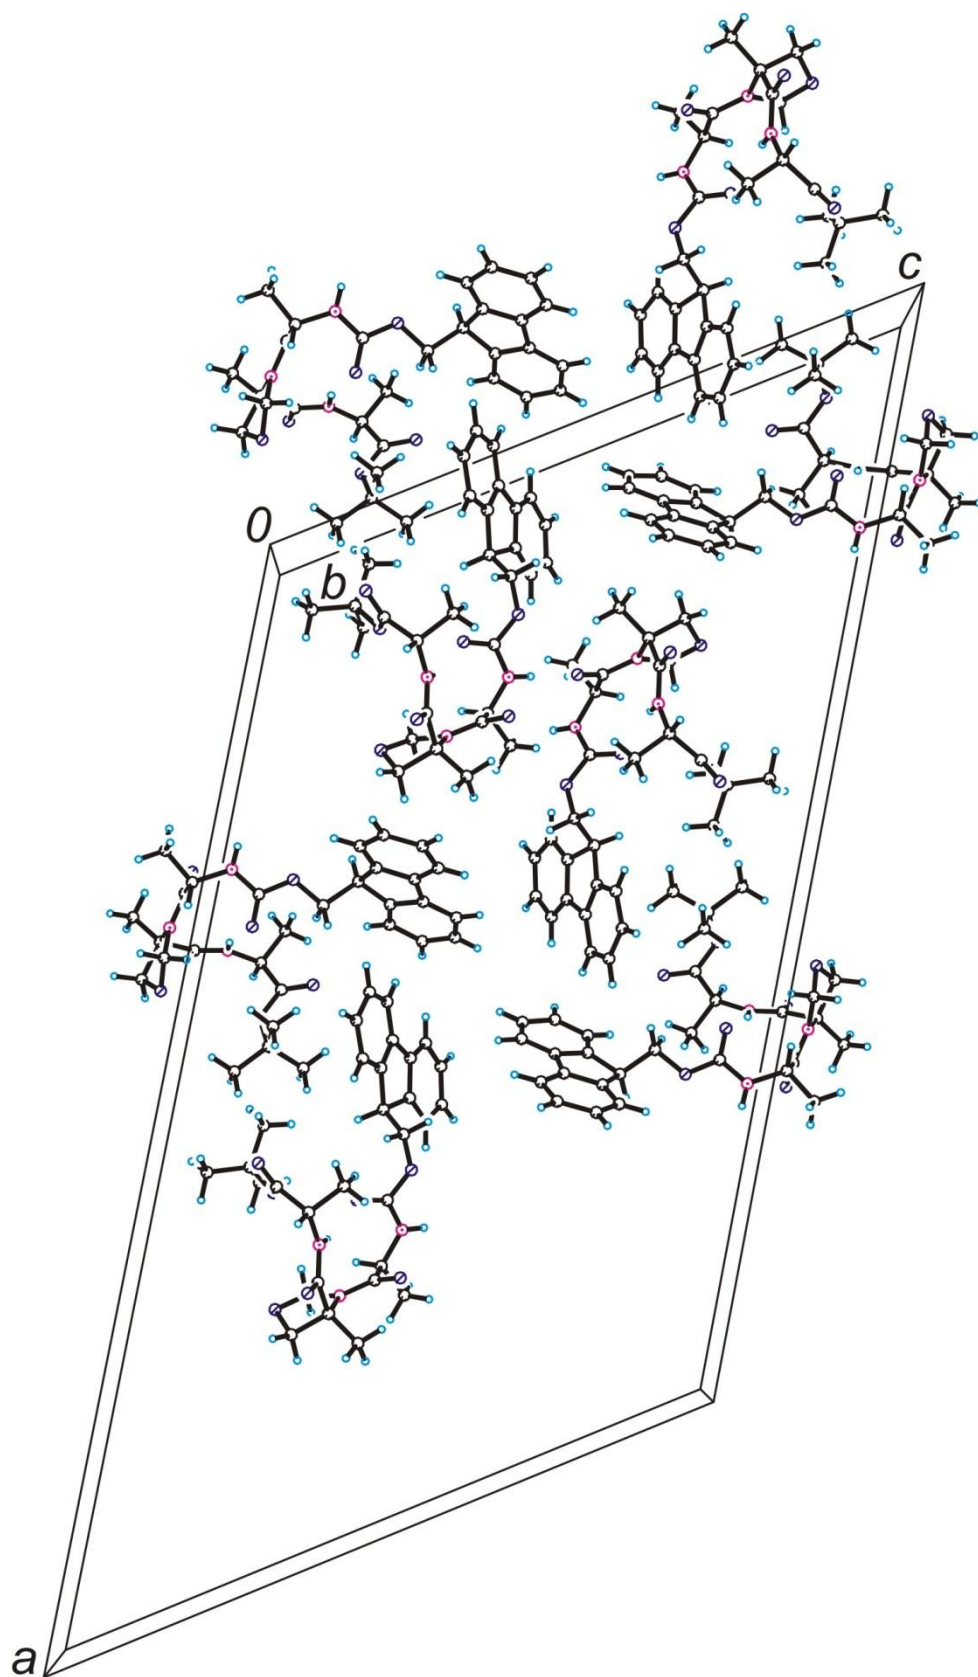

**Figure S10.** Packing diagram of Fmoc-Ala-(*R*)- $\alpha$ MeSer( $\Psi$ Pro)-Ala-OBu<sup>1</sup> (**6a**) with hydrogen bonds indicated with dashed lines.

**Table S1.** Main chain torsion angles ( $^{\circ}$ ) defining the peptide conformation of the two symmetrically independent molecules **a** (first entry) and **b** (second entry) of Fmoc-Ala-(*R*)-( $\alpha$ Me)Ser( $\Psi$ Pro)-Ala-OBu<sup>t</sup> (**6a**).

|             |                        |           |
|-------------|------------------------|-----------|
| $\phi(1)$   | C(15)-N(1)-C(16)-C(18) | -57.4(3)  |
|             | C(45)-N(4)-C(46)-C(48) | -58.8(3)  |
| $\psi(1)$   | N(1)-C(16)-C(18)-N(2)  | 139.5(2)  |
|             | N(4)-C(46)-C(48)-N(5)  | 129.1(2)  |
| $\omega(1)$ | O(1)-C(15)-N(1)-C(16)  | 179.0(3)  |
|             | O(8)-C(45)-N(4)-C(46)  | -179.6(3) |
| $\phi(2)$   | C(18)-N(2)-C(21)-C(23) | 78.8(3)   |
|             | C(48)-N(5)-C(51)-C(53) | 69.6(3)   |
| $\psi(2)$   | N(2)-C(21)-C(23)-N(3)  | 1.4(3)    |
|             | N(5)-C(51)-C(53)-N(6)  | 10.4(3)   |
| $\omega(2)$ | C(16)-C(18)-N(2)-C(21) | 176.0(2)  |
|             | C(46)-C(48)-N(5)-C(51) | 178.2(2)  |
| $\phi(3)$   | C(23)-N(3)-C(24)-C(26) | -124.5(3) |
|             | C(53)-N(6)-C(54)-C(56) | -131.9(3) |
| $\psi(3)$   | N(3)-C(24)-C(26)-O(6)  | -16.8(4)  |
|             | N(6)-C(54)-C(56)-O(14) | 59.5(3)   |
| $\omega(3)$ | C(21)-C(23)-N(3)-C(24) | 177.6(2)  |
|             | C(51)-C(53)-N(6)-C(54) | 171.9(2)  |

**Table S2** Intra- and Intermolecular Hydrogen Bond Parameters for the Fmoc-Ala-(*R*)-  
( $\alpha$ MeSer)( $\Psi$ Pro)-Ala-OBu<sup>t</sup> (**6a**). Distances and angles are in (Å) and (°), respectively.

---

| <b>D-H...A</b>    | <b>D-H</b> | <b>H...A</b> | <b>D...A</b> | <b>D-H...A</b> | <b>Symmetry code</b> |
|-------------------|------------|--------------|--------------|----------------|----------------------|
| N(1)-H(1)...O(3)  | 0.88       | 1.96         | 2.841(4)     | 177            | 3/2-x,1/2+y,1-z      |
| N(3)-H(31)...O(2) | 0.88       | 2.29         | 3.095(4)     | 152            | x,y,z                |
| N(4)-H(4)...O(10) | 0.88       | 2.03         | 2.897(4)     | 169            | 1/2-x,y-1/2,-z       |
| N(6)-H(6)...O(9)  | 0.88       | 2.06         | 2.903(4)     | 161            | x,y,z                |

---

**Table S3** Endocyclic 1,3-oxazolidine torsion angles ( $^{\circ}$ ) for each symmetrically independent molecule **A** (upper section) and **B** (lower section) of Fmoc-Ala-(*R*)- $\alpha$ MeSer( $\Psi$ Pro)-Ala-OBu<sup>t</sup> (**6a**) accompanied by the three lowest asymmetry parameters ( $^{\circ}$ ).

| Independent molecule | Torsion angle ( $^{\circ}$ )                                                               |          |
|----------------------|--------------------------------------------------------------------------------------------|----------|
| <b>A</b>             | O(4)-C(19)-N(2)-C(21)                                                                      | 4.7(3)   |
|                      | C(19)-N(2)-C(21)-C(20)                                                                     | 18.1(3)  |
|                      | N(2)-C(21)-C(20)-O(4)                                                                      | -34.9(3) |
|                      | C(21)-C(20)-O(4)-C(19)                                                                     | 40.8(3)  |
|                      | C(20)-O(4)-C(19)-N(2)                                                                      | -28.1(3) |
|                      | $\Delta C_s^{C(20)} = 8.2(3)$ $\Delta C_2^{N(2)} = 10.6(3)$ $\Delta C_s^{O(4)} = 23.2(3)$  |          |
| <b>B</b>             | O(11)-C(49)-N(5)-C(51)                                                                     | 14.1(3)  |
|                      | C(49)-N(5)-C(51)-C(50)                                                                     | 10.7(3)  |
|                      | N(5)-C(51)-C(50)-O(11)                                                                     | -32.1(3) |
|                      | C(51)-C(50)-O(11)-C(49)                                                                    | 43.4(3)  |
|                      | C(50)-O(11)-C(49)-N(5)                                                                     | -35.4(3) |
|                      | $\Delta C_2^{N(5)} = 3.3(3)$ $\Delta C_s^{O(11)} = 14.0(3)$ $\Delta C_s^{C(50)} = 23.2(3)$ |          |
